# Supplementary material for: Identification of a bet-hedging network motif generating noise in hormone concentrations and germination propensity in Arabidopsis
Source: PubMed Central journal article supplement (PMC5938590; doi:10.1098/rsif.2018.0042), 2018-04-11
Supplement: rsif20180042supp1.pdf [file rsif20180042supp1.pdf]

# Supplementary Information: Identification of a bet-hedging network motif generating noise in hormone concentrations and germination propensity in Arabidopsis

Iain G. Johnston\* and George W. Bassel  
*School of Biosciences, University of Birmingham, Birmingham, UK*

(Published in J Roy Soc Interf)

## Fluorescence microscopy.

The fluorescent reporter lines used are *AAO3::AAO3-GUS* [1], corresponding to the final step in ABA synthesis, and *CYP707A2::CYP707A2-GUS* [2], corresponding to a limiting step in ABA degradation. Images were acquired using primary dormant embryos as described in Ref. [2] using an inverted Zeiss LSM710 laser-scanning confocal microscope. Processing was performed using MorphoGraphX [3].

## System size expansion.

Given stoichiometric matrix  $S$  and a vector of rates  $\mathbf{f}$ , collecting terms in the system size expansion gives us

$$\frac{\partial \phi_i(t)}{\partial t} = \sum_{j=1}^R S_{ij} f_j, \quad (1)$$

describing the deterministic rate equations for the system, and

$$\frac{\partial \Pi(\xi, t)}{\partial t} = \sum_{j=1}^R \left( - \sum_{ik} S_{ik} \frac{\partial f_j}{\partial \phi_k} \frac{\partial \xi_k \Pi}{\partial \xi_i} + \frac{1}{2} f_j \sum_{ik} S_{ij} S_{kj} \frac{\partial^2 \Pi}{\partial \xi_i \partial \xi_k} \right), \quad (2)$$

a Fokker-Planck equation describing the time evolution of the distribution  $\Pi(\xi, t)$  of the fluctuating components. For the symmetric system, the ODEs governing mean behaviour, arising from Eqn. 1, are:

$$d\phi_A/dt = \lambda(1 + \Lambda\phi_S) - \nu(1 + \Lambda\phi_D)\phi_A \quad (3)$$

$$d\phi_S/dt = \beta\phi_A - \delta\phi_S \quad (4)$$

$$d\phi_D/dt = \beta\phi_A - \delta\phi_D. \quad (5)$$

The steady-state solution of these equations then gives our predicted mean values.

Multiplying Eqn. 2 through by the appropriate powers of our variables and integrating, we obtain ODEs governing variances and covariances for the symmetric system:

$$d\langle \xi_A^2 \rangle / dt = \lambda + \lambda\Lambda\phi_S + \nu\phi_A(1 + \Lambda\phi_D - 2\Lambda\langle \xi_A \xi_D \rangle) + 2\lambda\Lambda\langle \xi_A \xi_S \rangle - 2\nu\langle \xi_A^2 \rangle - 2\Lambda\nu\phi_D\langle \xi_A^2 \rangle \quad (6)$$

$$d\langle \xi_D^2 \rangle / dt = \delta\phi_D + \beta\phi_A - 2\delta\langle \xi_D^2 \rangle + 2\beta\langle \xi_A \xi_D \rangle \quad (7)$$

$$d\langle \xi_S^2 \rangle / dt = \delta\phi_S + \beta\phi_A - 2\delta\langle \xi_S^2 \rangle + 2\beta\langle \xi_A \xi_S \rangle \quad (8)$$

$$d\langle \xi_A \xi_D \rangle / dt = -\Lambda\nu\phi_A\langle \xi_D^2 \rangle + \lambda\Lambda\langle \xi_S \xi_D \rangle - \delta\langle \xi_A \xi_D \rangle - \nu(1 + \Lambda\phi_D)\langle \xi_A \xi_D \rangle + \beta\langle \xi_A^2 \rangle \quad (9)$$

$$d\langle \xi_A \xi_S \rangle / dt = -\Lambda\nu\phi_A\langle \xi_S \xi_D \rangle + \lambda\Lambda\langle \xi_S^2 \rangle - \delta\langle \xi_A \xi_S \rangle - \nu(1 + \Lambda\phi_D)\langle \xi_A \xi_S \rangle + \beta\langle \xi_A^2 \rangle \quad (10)$$

$$d\langle \xi_S \xi_D \rangle / dt = -2\delta\langle \xi_S \xi_D \rangle + \beta(\langle \xi_A \xi_D \rangle + \langle \xi_A \xi_S \rangle). \quad (11)$$

Again, the steady-state solution of these equations gives our predictions for the variances and covariances, where  $\langle \xi_A^2 \rangle$  is of particular interest.

The expression for  $\langle \xi_A^2 \rangle$  in the single-pathway model, and for  $\langle \xi_A^2 \rangle$  in the two-pathway model when  $\beta_s = \beta_d$ , both have the form

---

\*Electronic address: i.johnston.1@bham.ac.uk

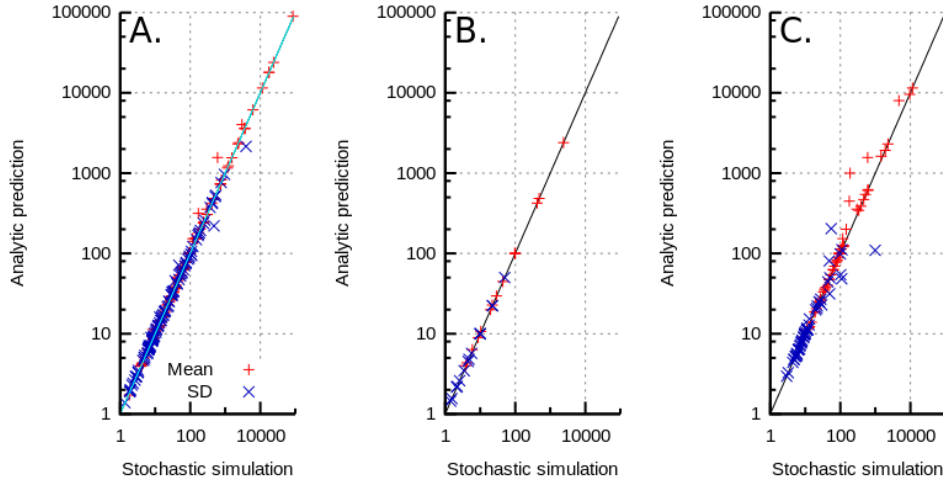

FIG. S1: **Comparing theory and simulation.** Values of  $\phi_A$  and  $\sqrt{\langle \xi_A^2 \rangle}$  predicted from stochastic theory and emerging from stochastic simulation, for a set of parameterisations of each model in the main text that spans the phase space portraits Figs. ?? and ??. The strong agreements supports the validity of the linear noise approximation throughout this investigation.

$$\langle \xi_A^2 \rangle = \frac{\beta \lambda^2 \Lambda_s (1 + \phi_A (\beta - 2) \Lambda_s) - \phi_A \nu (1 + \nu + \phi_A \beta \Lambda_d (1 + (3 + 2\phi_A (\beta + 1) \Lambda_d) \nu)) - \lambda (1 + \nu + \phi_A \beta (\Lambda_s + \Lambda_d (2 + \phi_A \gamma \Lambda_s) \nu))}{2(\beta \lambda \Lambda_s - \nu - 2\phi_A \beta \Lambda_d \nu) (1 + \nu + \phi_A \beta \Lambda_d \nu)} \quad (12)$$

For the two-pathway case,  $\gamma \equiv \beta$ ; for the one-pathway case,  $\gamma \equiv (\beta - 4)$ .

### Theory-simulation comparison.

Fig. S1 shows the agreement between theory and stochastic simulation for parameterisations and models used throughout this study.

### Germination propensities.

The experimental data from Ref. [4] takes two forms. First, several replicates of the following experiment were performed. Two sets of 30 seeds of wildtype plants and two sets of 30 seeds of *pTaEM:SbNCED* mutant plants (increasing ABA levels) are plated. The germination proportion in each set of 30 seeds is recorded after 5 days, obtaining proportions  $p_{WT,1}, p_{WT,2}, p_{MU,1}, p_{MU,2}$  respectively for the two wildtype (WT) and two mutant (MU) sets. We report the (untransformed) mean germination proportion for WT ( $\mu_{WT} = p_{WT,1} + p_{WT,2}$ ) and MU ( $\mu_{MU} = p_{MU,1} + p_{MU,2}$ ). Next we logit transform the individual germination proportions  $p_{o,\circ}$  using  $p'_{o,\circ} = \log(p_{o,\circ}/(1 - p_{o,\circ}))$ . We then take the (transformed) standard deviation of WT and MU ( $\sigma_o'^2 = \sum_i (p'_{o,i} - \mu_o')^2$ ). The statistics we plot are  $(\mu_{WT}, \sigma_{WT}')$ ,  $(\mu_{MU}, \sigma_{MU}')$ .

Second, several replicates of the following experiment were performed. ABA levels are measured in 3 sets of 50 wildtype seeds and 3 sets of 50 *pTaEM:SbNCED* mutant seeds. The mean  $\mu$  and standard deviation  $\sigma$  of ABA mass per seed are reported. The statistics we plot are  $\mu$  and the coefficient of variation  $\eta = \sigma/\mu$ .

### Dependence on degradation parameters.

In the main text we set  $\delta_s = \delta_d = 1$  to allow an intuitive exploration of the system's behaviour. Fig. S2 shows some sampled effects of relaxing this assumption and allowing  $\delta_s$  and  $\delta_d$  to vary independently over orders of magnitude. While a quantitatively diverse range of behaviours is exhibited, an intuitive general trend is seen. Decreasing  $\delta_d$  increases the influence of the ABA degradation pathway, lowering mean ABA levels and increasing noise. Decreasing  $\delta_s$  has the opposite effect, increasing the influence of the synthesis pathway, increasing mean ABA levels and decreasing noise. Increasing  $\delta_d$  or  $\delta_s$  has a comparatively limited effect in many cases; as the other parameter values are constrained to lie on  $[0, 1]$ , excess degradation of one pathway has limited influence once this pathway provides only a weak contribution to the overall dynamics.

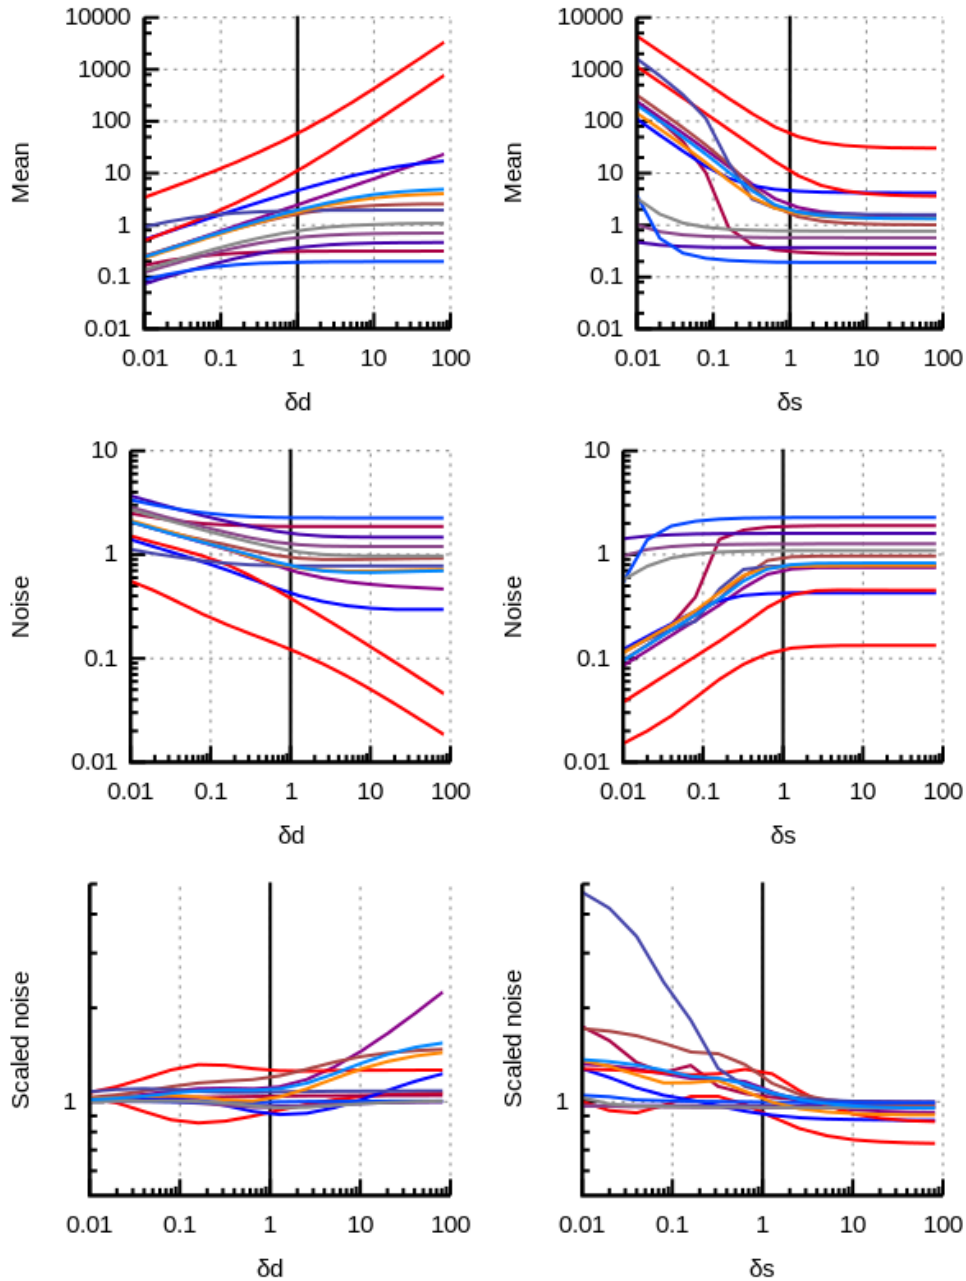

FIG. S2: **Sampled effect of varying degradation parameters.** For each trace, the values of  $\beta_s, \beta_d, \nu, \lambda, \Lambda_s, \Lambda_d$  are randomly sampled from  $\mathcal{U}(0, 1)$ . One of  $\delta_d, \delta_s$  is fixed at 1 and the other is varied over orders of magnitude (horizontal axis). Steady-state ABA mean, noise, and scaled noise are then reported (vertical axis).

- 
- [1] Mitsunori Seo, Atsushi Hanada, Ayuko Kuwahara, Akira Endo, Masanori Okamoto, Yukika Yamauchi, Helen North, Annie Marion-Poll, Tai-ping Sun, Tomokazu Koshiba, et al. Regulation of hormone metabolism in *Arabidopsis* seeds: phytochrome regulation of abscisic acid metabolism and abscisic acid regulation of gibberellin metabolism. *The Plant Journal*, 48(3):354–366, 2006.
- [2] Alexander T Topham, Rachel E Taylor, Dawei Yan, Eiji Nambara, Iain G Johnston, and George W Bassel. Temperature variability is integrated by a spatially embedded decision-making center to break dormancy in *Arabidopsis* seeds. *Proceedings of the National Academy of Sciences*, page 201704745, 2017.
- [3] Pierre Barbier de Reuille, Anne-Lise Routier-Kierzkowska, Daniel Kierzkowski, George W Bassel, Thierry Schüpbach, Gerardo Tauriello, Namrata Bajpai, Sören Strauss, Alain Weber, Annamaria Kiss, et al. Morphographx: a platform for quantifying morphogenesis in 4d. *Elife*, 4:e05864, 2015.

- [4] Mariko Nonogaki, Khadidiatou Sall, Eiji Nambara, and Hiroyuki Nonogaki. Amplification of ABA biosynthesis and signaling through a positive feedback mechanism in seeds. *The Plant Journal*, 78(3):527–539, 2014.
